# Supplementary material for: The neuropeptide tachykinin is essential for pheromone detection in a gustatory neural circuit
Source: eLife journal article supplement (doi:10.7554/elife.06914), 2015-06-17
Supplement: supp [file elife-06914-supp-v1.zip]

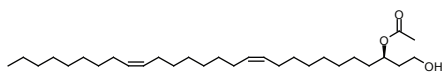

(3*R*,11*Z*,19*Z*)-CH503 (natural stereoisomer)

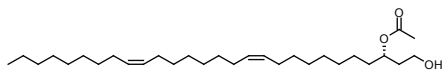

(3*S*,11*Z*,19*Z*)-CH503 (artificial stereoisomer)

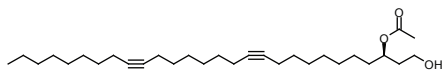

(*R*)-3-Acetoxy-11,19-octacosadiyn-1-ol (synthetic analog, behaviorally inert)

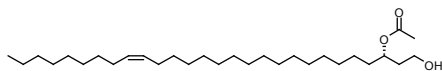

(*S*)-3-Acetoxy-19-octacosen-1-ol (synthetic analog, behaviorally inert)
