# Supplementary figures and images for: The neuropeptide tachykinin is essential for pheromone detection in a gustatory neural circuit
Source: eLife journal article supplement (doi:10.7554/elife.06914), 2015-06-17

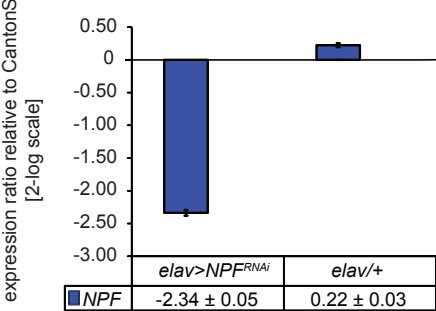

Supplement: supp [file elife-06914-supp-v1.zip]

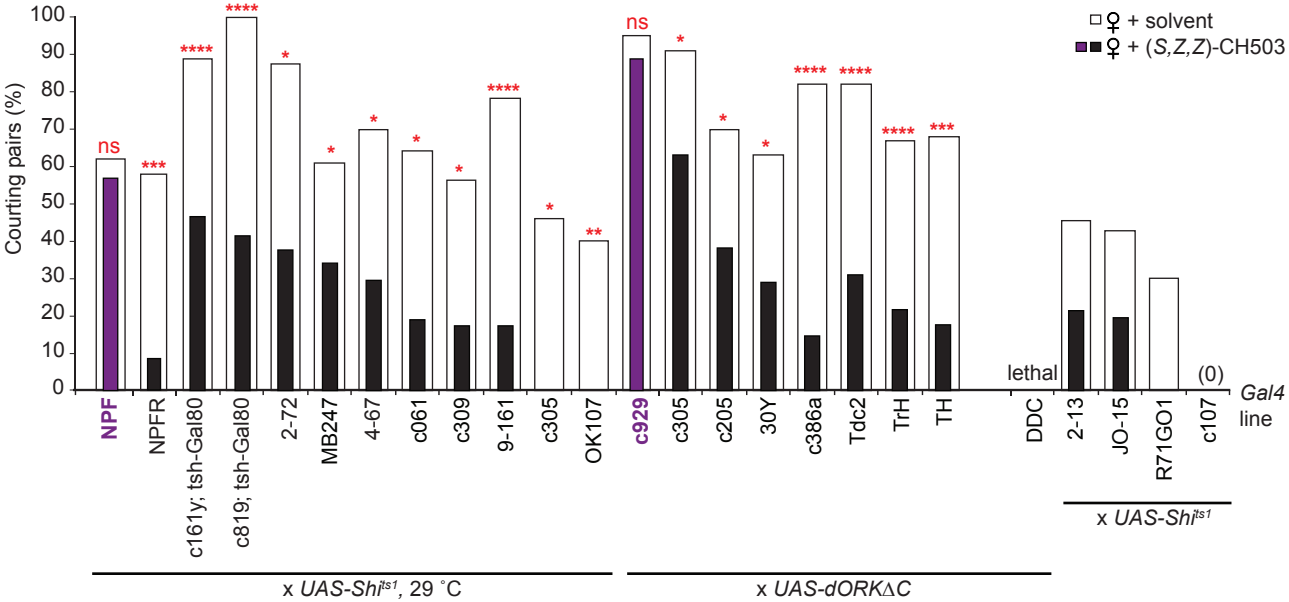

Supplement: supp [file elife-06914-supp-v1.zip]

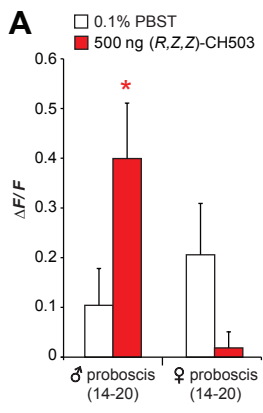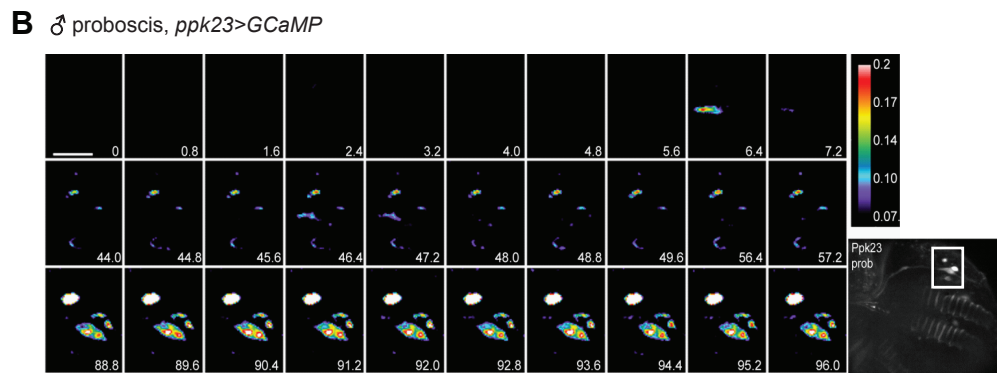

Supplement: supp [file elife-06914-supp-v1.zip]

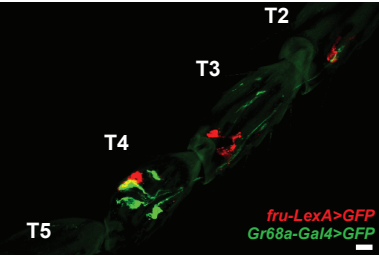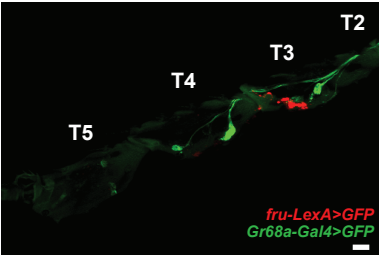

Supplement: supp [file elife-06914-supp-v1.zip]

**A**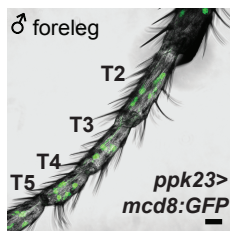**B**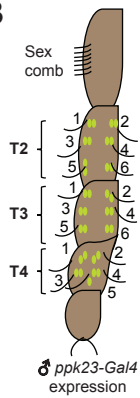**♂ foreleg, *ppk23>GCaMP***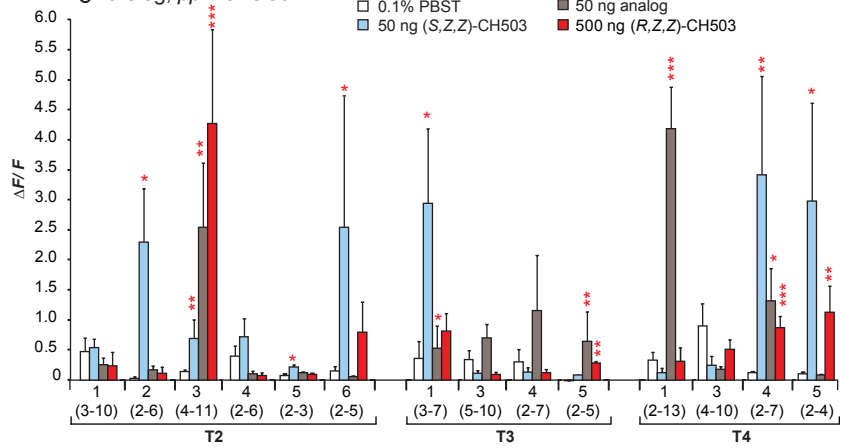**C** ♂ foreleg, *ppk23>GCaMP*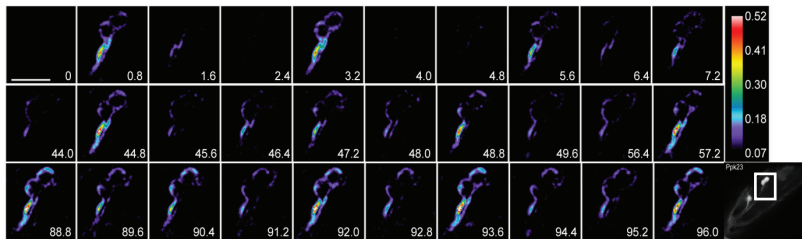**D** *ppk23* neuron, T2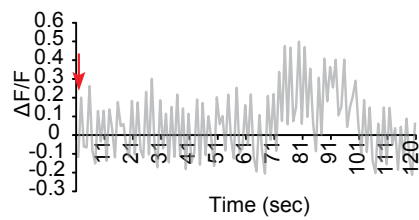

Supplement: supp [file elife-06914-supp-v1.zip]

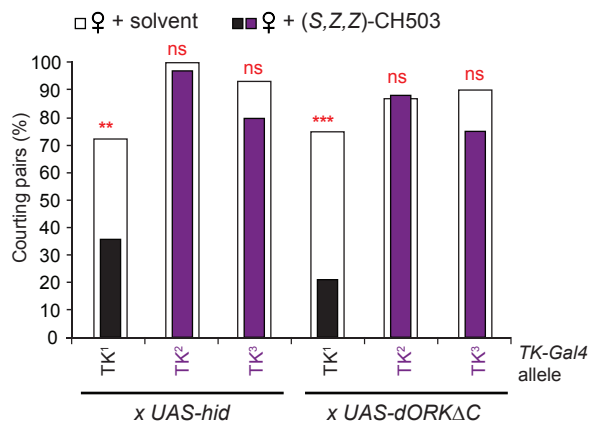

Supplement: supp [file elife-06914-supp-v1.zip]

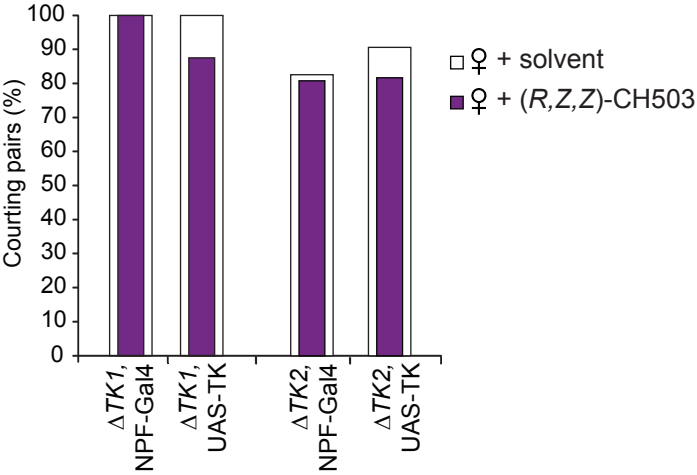

Supplement: supp [file elife-06914-supp-v1.zip]

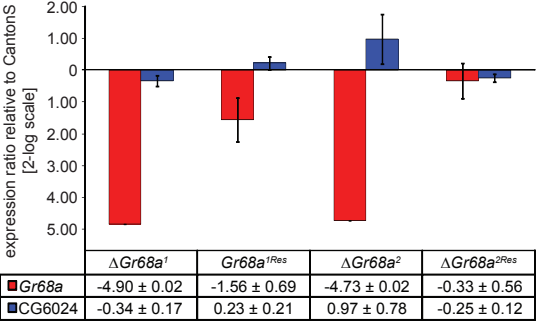

Supplement: supp [file elife-06914-supp-v1.zip]

♂ foreleg, *Gr68a>GCaMP*

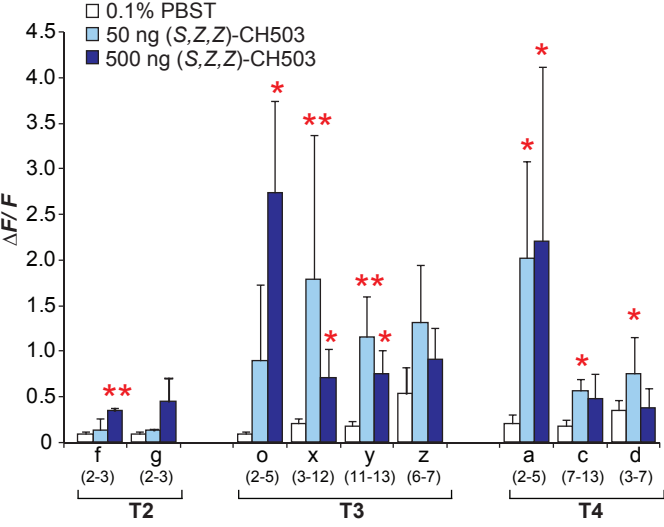

Supplement: supp [file elife-06914-supp-v1.zip]

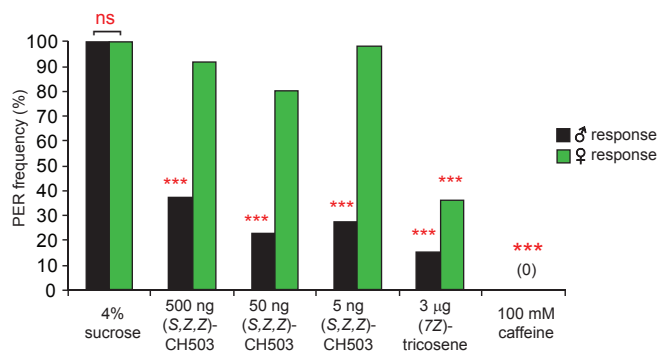

Supplement: supp [file elife-06914-supp-v1.zip]

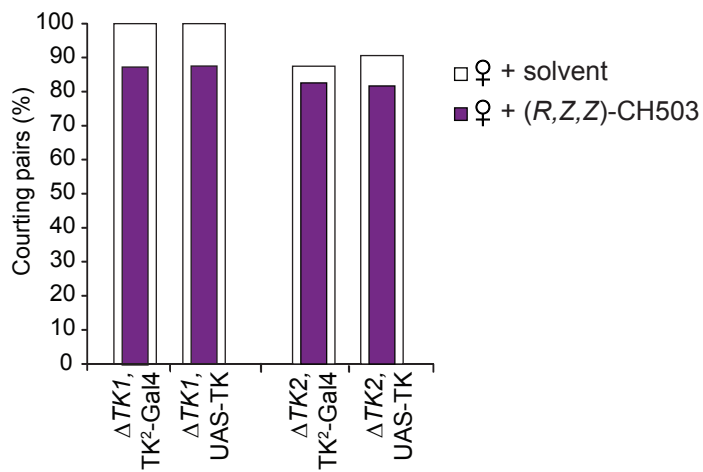

Supplement: supp [file elife-06914-supp-v1.zip]

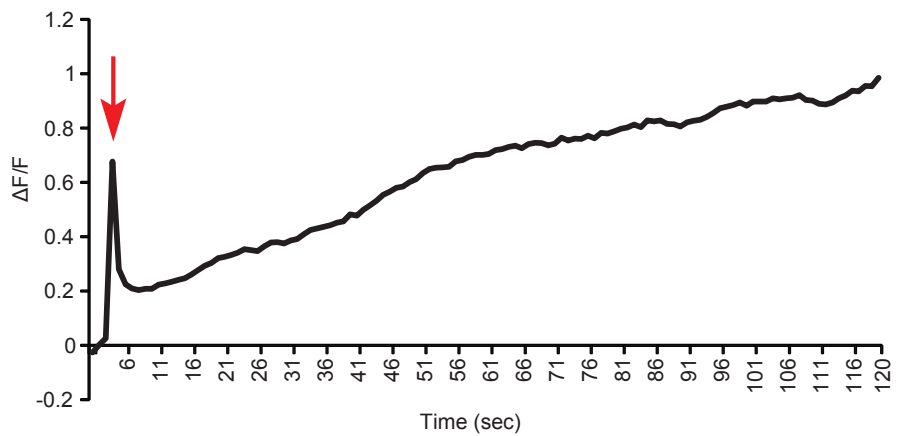

Supplement: supp [file elife-06914-supp-v1.zip]

*TK-LexA>LexAop-spGFP, UAS-spGFP*

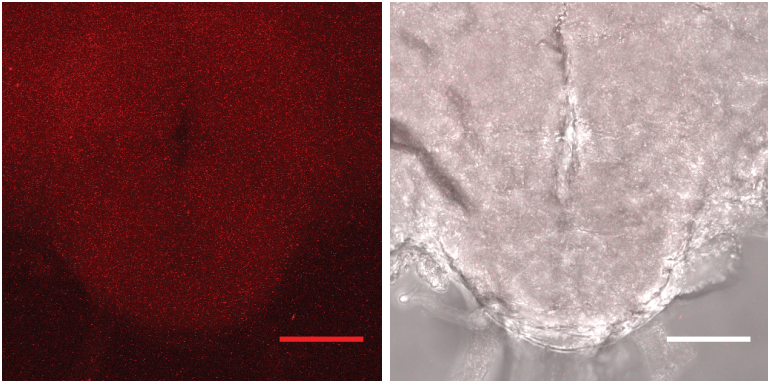

Supplement: supp [file elife-06914-supp-v1.zip]

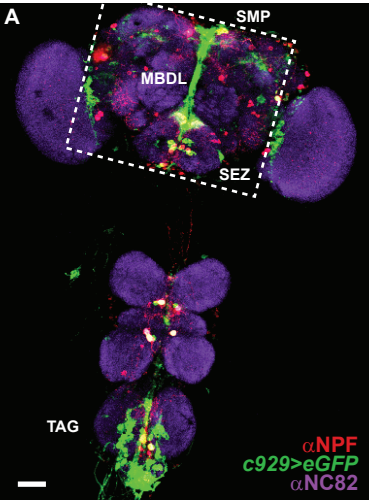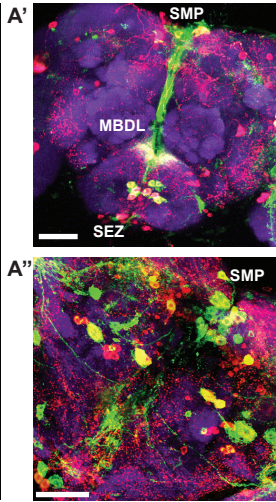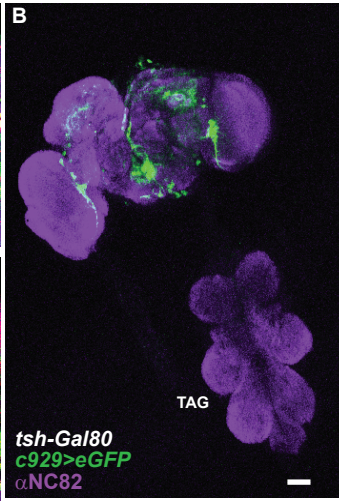

Supplement: supp [file elife-06914-supp-v1.zip]

♂ foreleg, *Gr68a>GCaMP*, *68a-RNAi*

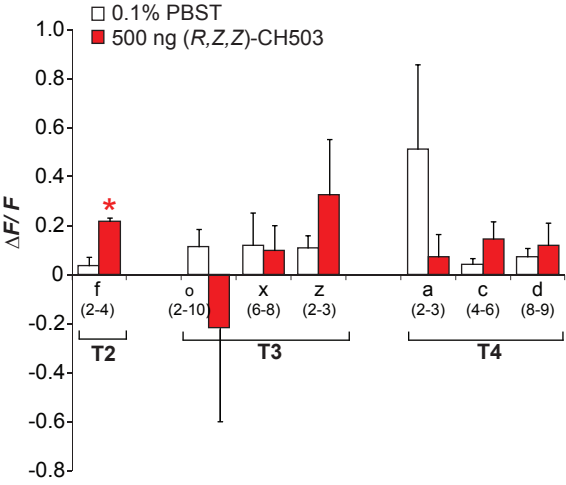

Supplement: supp [file elife-06914-supp-v1.zip]

A

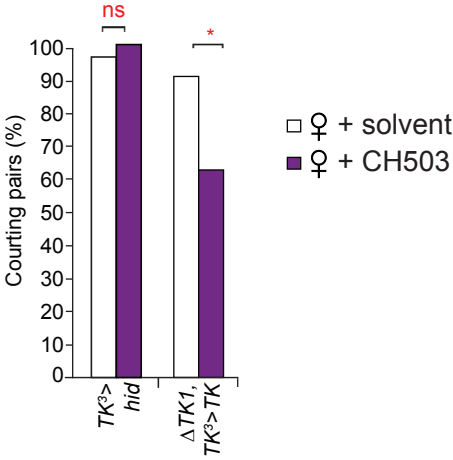

B

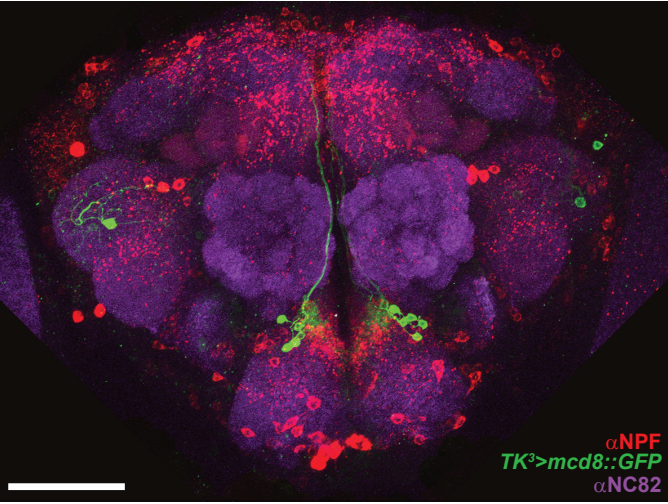

Supplement: supp [file elife-06914-supp-v1.zip]
